# Supplementary material for: Emergence of growth and dormancy from a kinetic model of the Escherichia coli central carbon metabolism
Source: Research Square preprint supplement (doi:10.21203/rs.3.rs-1193900/v1), 2022-01-07
Supplement: Supplementary file 1 [file SI_Data1.xls]

## Sheet: model0
reaction name	substrates	products	reversibility parameter
ACONTa	cit	acon	1.0
ACONTb	acon	icit	1.0
ADK1	amp,atp	adp,adp	1.0
AKGDH	akg,adp	atp,succoa	1e-06
CS	accoa,oaa	cit	1e-06
ENO	2pg	pep	1.0
FBA	fdp	dhap,g3p	1.0
FBP	fdp	f6p	1e-06
FRD7	fum	succ	1e-06
FUM	fum	mal	1.0
G6PDH2r	glc,adp	6pgl,atp	1.0
GAPD	g3p,adp	13dpg,atp	1.0
GND	6pgc,adp	atp,ru5p	1e-06
ICDHyr	icit,adp	akg,atp	1.0
ICL	icit	glx,succ	1e-06
MALS	accoa,glx	mal	1e-06
MDH	mal,adp	atp,oaa	1.0
ME1	mal,adp	atp,pyr	1.0
PDH	adp,pyr	accoa,atp	1e-06
PFK	atp,f6p	adp,fdp	1e-06
PGI	glc	f6p	1.0
PGK	3pg,atp	13dpg,adp	1.0
PGL	6pgl	6pgc	1e-06
PGM	2pg	3pg	1.0
PPC	pep	oaa	1e-06
PPCK	atp,oaa	adp,pep	1e-06
PPS	atp,pyr	amp,pep	1e-06
PYK	adp,pep	atp,pyr	1e-06
RPE	ru5p	xu5p	1.0
RPI	r5p	ru5p	1.0
SUCOAS	atp,succ	adp,succoa	1.0
TALA	g3p,s7p	e4p,f6p	1.0
TKT1	r5p,xu5p	g3p,s7p	1.0
TKT2	e4p,xu5p	f6p,g3p	1.0
TPI	dhap	g3p	1.0
GLUDy	glu,adp	akg,atp	1.0
GLUN	gln	glu	1e-06
GLUSy	akg,gln,atp	glu,glu,adp	1e-06
GLNS	atp,glu	adp,gln	1e-06
growth	e4p,gln,atp	adp	0

## Sheet: model1
reaction name	substrates	products	reversibility parameter
ACONTa	cit	acon	1.0
ACONTb	acon	icit	1.0
ADK1	amp,atp	adp,adp	1.0
AKGDH	akg,adp	atp,succoa	1e-06
CS	accoa,oaa	cit	1e-06
ENO	2pg	pep	1.0
FBA	fdp	dhap,g3p	1.0
FBP	fdp	f6p	1e-06
FRD7	fum	succ	1e-06
FUM	fum	mal	1.0
G6PDH2r	glc,adp	6pgl,atp	1.0
GAPD	g3p,adp	13dpg,atp	1.0
GND	6pgc,adp	atp,ru5p	1e-06
ICDHyr	icit,adp	akg,atp	1.0
ICL	icit	glx,succ	1e-06
MALS	accoa,glx	mal	1e-06
MDH	mal,adp	atp,oaa	1.0
ME1	mal,adp	atp,pyr	1.0
PDH	adp,pyr	accoa,atp	1e-06
PFK	atp,f6p	adp,fdp	1e-06
PGI	glc	f6p	1.0
PGK	3pg,atp	13dpg,adp	1.0
PGL	6pgl	6pgc	1e-06
PGM	2pg	3pg	1.0
PPC	pep	oaa	1e-06
PPCK	atp,oaa	adp,pep	1e-06
PPS	atp,pyr	amp,pep	1e-06
PYK	adp,pep	atp,pyr	1e-06
RPE	ru5p	xu5p	1.0
RPI	r5p	ru5p	1.0
SUCOAS	atp,succ	adp,succoa	1.0
TALA	g3p,s7p	e4p,f6p	1.0
TKT1	r5p,xu5p	g3p,s7p	1.0
TKT2	e4p,xu5p	f6p,g3p	1.0
TPI	dhap	g3p	1.0
GLUDy	glu,adp	akg,atp	1.0
GLUN	gln	glu	1e-06
GLNS	atp,glu	adp,gln	1e-06
growth	e4p,gln,atp	adp	0

## Sheet: model2
reaction name	substrates	products	reversibility parameter
ACONTa	cit	acon	1.0
ACONTb	acon	icit	1.0
ADK1	amp,atp	adp,adp	1.0
AKGDH	akg,adp	atp,succoa	1e-06
CS	accoa,oaa	cit	1e-06
ENO	2pg	pep	1.0
FBA	fdp	dhap,g3p	1.0
FBP	fdp	f6p	1e-06
FRD7	fum	succ	1e-06
FUM	fum	mal	1.0
G6PDH2r	glc,adp	6pgl,atp	1.0
GAPD	g3p,adp	13dpg,atp	1.0
GND	6pgc,adp	atp,ru5p	1e-06
ICDHyr	icit,adp	akg,atp	1.0
ICL	icit	glx,succ	1e-06
MALS	accoa,glx	mal	1e-06
MDH	mal,adp	atp,oaa	1.0
ME1	mal,adp	atp,pyr	1.0
PDH	adp,pyr	accoa,atp	1e-06
PFK	atp,f6p	adp,fdp	1e-06
PGI	glc	f6p	1.0
PGK	3pg,atp	13dpg,adp	1.0
PGL	6pgl	6pgc	1e-06
PGM	2pg	3pg	1.0
PPC	pep	oaa	1e-06
PPCK	atp,oaa	adp,pep	1e-06
PPS	atp,pyr	amp,pep	1e-06
PYK	adp,pep	atp,pyr	1e-06
RPE	ru5p	xu5p	1.0
RPI	r5p	ru5p	1.0
SUCOAS	atp,succ	adp,succoa	1.0
TALA	g3p,s7p	e4p,f6p	1.0
TKT1	r5p,xu5p	g3p,s7p	1.0
TKT2	e4p,xu5p	f6p,g3p	1.0
TPI	dhap	g3p	1.0
GLUDy	glu,adp	akg,atp	1.0
GLNS	atp,glu	adp,gln	1e-06
growth	e4p,gln,atp	adp	0

## Sheet: model3
reaction name	substrates	products	reversibility parameter
ACONTa	cit	acon	1.0
ACONTb	acon	icit	1.0
ADK1	amp,atp	adp,adp	1.0
AKGDH	akg,adp	atp,succoa	1e-06
CS	accoa,oaa	cit	1e-06
ENO	2pg	pep	1.0
FBA	fdp	dhap,g3p	1.0
FBP	fdp	f6p	1e-06
FRD7	fum	succ	1e-06
FUM	fum	mal	1.0
G6PDH2r	glc,adp	6pgl,atp	1.0
GAPD	g3p,adp	13dpg,atp	1.0
GND	6pgc,adp	atp,ru5p	1e-06
ICDHyr	icit,adp	akg,atp	1.0
ICL	icit	glx,succ	1e-06
MALS	accoa,glx	mal	1e-06
MDH	mal,adp	atp,oaa	1.0
ME1	mal,adp	atp,pyr	1.0
PDH	adp,pyr	accoa,atp	1e-06
PFK	atp,f6p	adp,fdp	1e-06
PGI	glc	f6p	1.0
PGK	3pg,atp	13dpg,adp	1.0
PGL	6pgl	6pgc	1e-06
PGM	2pg	3pg	1.0
PPC	pep	oaa	1e-06
PPCK	atp,oaa	adp,pep	1e-06
PPS	atp,pyr	amp,pep	1e-06
PYK	adp,pep	atp,pyr	1e-06
RPE	ru5p	xu5p	1.0
RPI	r5p	ru5p	1.0
SUCOAS	atp,succ	adp,succoa	1.0
TALA	g3p,s7p	e4p,f6p	1.0
TKT1	r5p,xu5p	g3p,s7p	1.0
TKT2	e4p,xu5p	f6p,g3p	1.0
TPI	dhap	g3p	1.0
GLUDy	glu,adp	akg,atp	1.0
growth	e4p,glu,atp	adp	0

## Sheet: model4
reaction name	substrates	products	reversibility parameter
ACONTa	cit	acon	1.0
ACONTb	acon	icit	1.0
ADK1	amp,atp	adp,adp	1.0
AKGDH	glu,adp	atp,succoa	1e-06
CS	accoa,oaa	cit	1e-06
ENO	2pg	pep	1.0
FBA	fdp	dhap,g3p	1.0
FBP	fdp	f6p	1e-06
FRD7	fum	succ	1e-06
FUM	fum	mal	1.0
G6PDH2r	glc,adp	6pgl,atp	1.0
GAPD	g3p,adp	13dpg,atp	1.0
GND	6pgc,adp	atp,ru5p	1e-06
ICDHyr	icit,adp	glu,atp	1.0
ICL	icit	glx,succ	1e-06
MALS	accoa,glx	mal	1e-06
MDH	mal,adp	atp,oaa	1.0
ME1	mal,adp	atp,pyr	1.0
PDH	adp,pyr	accoa,atp	1e-06
PFK	atp,f6p	adp,fdp	1e-06
PGI	glc	f6p	1.0
PGK	3pg,atp	13dpg,adp	1.0
PGL	6pgl	6pgc	1e-06
PGM	2pg	3pg	1.0
PPC	pep	oaa	1e-06
PPCK	atp,oaa	adp,pep	1e-06
PPS	atp,pyr	amp,pep	1e-06
PYK	adp,pep	atp,pyr	1e-06
RPE	ru5p	xu5p	1.0
RPI	r5p	ru5p	1.0
SUCOAS	atp,succ	adp,succoa	1.0
TALA	g3p,s7p	e4p,f6p	1.0
TKT1	r5p,xu5p	g3p,s7p	1.0
TKT2	e4p,xu5p	f6p,g3p	1.0
TPI	dhap	g3p	1.0
growth	e4p,glu,atp	adp	0

## Sheet: model5
reaction name	substrates	products	reversibility parameter
ACONTa	cit	acon	1.0
ACONTb	acon	icit	1.0
ADK1	amp,atp	adp,adp	1.0
AKGDH	glu,adp	atp,succoa	1e-06
CS	accoa,oaa	cit	1e-06
ENO	2pg	pep	1.0
FBA	fdp	dhap,g3p	1.0
FBP	fdp	f6p	1e-06
FRD7	fum	succ	1e-06
FUM	fum	mal	1.0
GAPD	g3p,adp	13dpg,atp	1.0
GND	6pgc,adp	atp,ru5p	1e-06
ICDHyr	icit,adp	glu,atp	1.0
ICL	icit	glx,succ	1e-06
MALS	accoa,glx	mal	1e-06
MDH	mal,adp	atp,oaa	1.0
ME1	mal,adp	atp,pyr	1.0
PDH	adp,pyr	accoa,atp	1e-06
PFK	atp,f6p	adp,fdp	1e-06
PGI	glc	f6p	1.0
PGK	3pg,atp	13dpg,adp	1.0
PGL	glc	6pgc	1e-06
PGM	2pg	3pg	1.0
PPC	pep	oaa	1e-06
PPCK	atp,oaa	adp,pep	1e-06
PPS	atp,pyr	amp,pep	1e-06
PYK	adp,pep	atp,pyr	1e-06
RPE	ru5p	xu5p	1.0
RPI	r5p	ru5p	1.0
SUCOAS	atp,succ	adp,succoa	1.0
TALA	g3p,s7p	e4p,f6p	1.0
TKT1	r5p,xu5p	g3p,s7p	1.0
TKT2	e4p,xu5p	f6p,g3p	1.0
TPI	dhap	g3p	1.0
growth	e4p,glu,atp	adp	0

## Sheet: model6
reaction name	substrates	products	reversibility parameter
ACONTa	cit	acon	1.0
ACONTb	acon	icit	1.0
ADK1	amp,atp	adp,adp	1.0
AKGDH	glu,adp	atp,succoa	1e-06
CS	accoa,oaa	cit	1e-06
ENO	2pg	pep	1.0
FBA	fdp	dhap,g3p	1.0
FBP	fdp	f6p	1e-06
FRD7	fum	succ	1e-06
FUM	fum	mal	1.0
GAPD	g3p,adp	13dpg,atp	1.0
GND	glc,adp	atp,ru5p	1e-06
ICDHyr	icit,adp	glu,atp	1.0
ICL	icit	glx,succ	1e-06
MALS	accoa,glx	mal	1e-06
MDH	mal,adp	atp,oaa	1.0
ME1	mal,adp	atp,pyr	1.0
PDH	adp,pyr	accoa,atp	1e-06
PFK	atp,f6p	adp,fdp	1e-06
PGI	glc	f6p	1.0
PGK	3pg,atp	13dpg,adp	1.0
PGM	2pg	3pg	1.0
PPC	pep	oaa	1e-06
PPCK	atp,oaa	adp,pep	1e-06
PPS	atp,pyr	amp,pep	1e-06
PYK	adp,pep	atp,pyr	1e-06
RPE	ru5p	xu5p	1.0
RPI	r5p	ru5p	1.0
SUCOAS	atp,succ	adp,succoa	1.0
TALA	g3p,s7p	e4p,f6p	1.0
TKT1	r5p,xu5p	g3p,s7p	1.0
TKT2	e4p,xu5p	f6p,g3p	1.0
TPI	dhap	g3p	1.0
growth	e4p,glu,atp	adp	0

## Sheet: model7
reaction name	substrates	products	reversibility parameter
ACONTa	cit	acon	1.0
ACONTb	acon	icit	1.0
ADK1	amp,atp	adp,adp	1.0
AKGDH	glu,adp	atp,succoa	1e-06
CS	accoa,oaa	cit	1e-06
ENO	2pg	pep	1.0
FBA	fdp	dhap,g3p	1.0
FBP	fdp	f6p	1e-06
FRD7	fum	succ	1e-06
FUM	fum	mal	1.0
GAPD	g3p,adp	13dpg,atp	1.0
GND	glc,adp	atp,ru5p	1e-06
ICDHyr	icit,adp	glu,atp	1.0
ICL	icit	glx,succ	1e-06
MALS	accoa,glx	mal	1e-06
MDH	mal,adp	atp,oaa	1.0
ME1	mal,adp	atp,pyr	1.0
PDH	adp,pyr	accoa,atp	1e-06
PFK	atp,f6p	adp,fdp	1e-06
PGI	glc	f6p	1.0
PGK	3pg,atp	13dpg,adp	1.0
PGM	2pg	3pg	1.0
PPC	pep	oaa	1e-06
PPCK	atp,oaa	adp,pep	1e-06
PPS	atp,pyr	amp,pep	1e-06
PYK	adp,pep	atp,pyr	1e-06
RPE	ru5p	xu5p	1.0
SUCOAS	atp,succ	adp,succoa	1.0
TKT2	e4p,xu5p	f6p,g3p	1.0
TPI	dhap	g3p	1.0
growth	e4p,glu,atp	adp	0

## Sheet: model8
reaction name	substrates	products	reversibility parameter
ACONTa	cit	acon	1.0
ACONTb	acon	icit	1.0
ADK1	amp,atp	adp,adp	1.0
AKGDH	glu,adp	atp,succoa	1e-06
CS	accoa,oaa	cit	1e-06
ENO	2pg	pep	1.0
FBA	fdp	dhap,g3p	1.0
FRD7	fum	succ	1e-06
FUM	fum	mal	1.0
GAPD	g3p,adp	13dpg,atp	1.0
ICDHyr	icit,adp	glu,atp	1.0
ICL	icit	glx,succ	1e-06
MALS	accoa,glx	mal	1e-06
MDH	mal,adp	atp,oaa	1.0
ME1	mal,adp	atp,pyr	1.0
PDH	adp,pyr	accoa,atp	1e-06
PFK	atp,glc	adp,fdp	1e-06
PGK	3pg,atp	13dpg,adp	1.0
PGM	2pg	3pg	1.0
PPC	pep	oaa	1e-06
PPCK	atp,oaa	adp,pep	1e-06
PPS	atp,pyr	amp,pep	1e-06
PYK	adp,pep	atp,pyr	1e-06
SUCOAS	atp,succ	adp,succoa	1.0
TPI	dhap	g3p	1.0
growth	glu,atp,glc	adp	0

## Sheet: model9
reaction name	substrates	products	reversibility parameter
ACONTa	cit	acon	1.0
ACONTb	acon	icit	1.0
ADK1	amp,atp	adp,adp	1.0
AKGDH	glu,adp	atp,succoa	1e-06
CS	accoa,oaa	cit	1e-06
ENO	2pg	pep	1.0
FBA	glc	dhap,g3p	1.0
FRD7	fum	succ	1e-06
FUM	fum	mal	1.0
GAPD	g3p,adp	13dpg,atp	1.0
ICDHyr	icit,adp	glu,atp	1.0
ICL	icit	glx,succ	1e-06
MALS	accoa,glx	mal	1e-06
MDH	mal,adp	atp,oaa	1.0
ME1	mal,adp	atp,pyr	1.0
PDH	adp,pyr	accoa,atp	1e-06
PGK	3pg,atp	13dpg,adp	1.0
PGM	2pg	3pg	1.0
PPC	pep	oaa	1e-06
PPCK	atp,oaa	adp,pep	1e-06
PPS	atp,pyr	amp,pep	1e-06
PYK	adp,pep	atp,pyr	1e-06
SUCOAS	atp,succ	adp,succoa	1.0
TPI	dhap	g3p	1.0
growth	glu,atp,glc	adp	0

[truncated: 9 more sheets: model10, model11, model12, model13, model14, model15, model16, model17, model18]
