# Supplementary material for: Emergence of growth and dormancy from a kinetic model of the Escherichia coli central carbon metabolism
Source: Research Square preprint supplement (doi:10.21203/rs.3.rs-1193900/v1), 2022-01-07
Supplement: Supplementary file 2 [file SI_Data2.xls]

## Sheet: back-calculated rate constants
The symbol notation follows Khodayari et al. Met. eng. 25 (2014): 50-62.
reaction name	rate (mM/sec)
ACONTa_1_f	20453.8
ACONTa_1_b	13198.6
ACONTa_2_f	1009.87
ACONTa_2_b	898.598
ACONTa_3_f	531.182
ACONTa_3_b	11875
ACONTa_4_f	1142.3
ACONTa_4_b	227.012
ACONTb_1_f	8461.53
ACONTb_1_b	3487.02
ACONTb_2_f	71852.8
ACONTb_2_b	117475
ACONTb_3_f	2599.88
ACONTb_3_b	651.908
ACONTb_4_f	23073.7
ACONTb_4_b	110370
ADK1_1_f	2458.57
ADK1_1_b	681.347
ADK1_2_f	391.537
ADK1_2_b	15193.2
ADK1_3_f	36715.1
ADK1_3_b	1.38265e+06
ADK1_4_f	2.87117e+06
ADK1_4_b	197993
ADK1_5_f	62740.1
ADK1_5_b	1234.43
AKGDH_1_f	183.181
AKGDH_1_b	124.551
AKGDH_2_f	453.091
AKGDH_2_b	13.9772
AKGDH_3_f	1058.61
AKGDH_3_b	176.341
AKGDH_4_f	3362.72
AKGDH_4_b	2692.05
AKGDH_5_f	29027.3
AKGDH_5_b	1834.53
AKGDH_6_f	4401.29
AKGDH_6_b	172.972
CS_1_f	4526.34
CS_1_b	3.67684
CS_2_f	277.616
CS_2_b	2841.27
CS_3_f	12209.6
CS_3_b	232.844
CS_4_f	2885.57
CS_4_b	2150.15
CS_5_f	14553.4
CS_5_b	717.782
CS_6_f	9084.13
CS_6_b	784.373
ENO_1_f	8763.06
ENO_1_b	3274.8
ENO_2_f	3066.06
ENO_2_b	7820.72
ENO_3_f	15422
ENO_3_b	5200.62
ENO_4_f	6103.94
ENO_4_b	152.126
FBA_1_f	755.158
FBA_1_b	301.638
FBA_2_f	2453.72
FBA_2_b	14553
FBA_3_f	8515.36
FBA_3_b	485.373
FBA_4_f	1002.5
FBA_4_b	28649.7
FBP_1_f	2.03047
FBP_1_b	0.511669
FBP_2_f	2.35147
FBP_2_b	0.261636
FBP_3_f	25.343
FBP_3_b	25.8993
FBP_4_f	5.16842
FBP_4_b	6.56352
FBP_5_f	3.64778
FBP_5_b	2.91273
FUM_1_f	353.747
FUM_1_b	58.8686
FUM_2_f	393.054
FUM_2_b	386.338
FUM_3_f	1671.92
FUM_3_b	1500.64
FUM_4_f	1200.41
FUM_4_b	48.446
G6PDH2r_1_f	1148.4
G6PDH2r_1_b	133.29
G6PDH2r_2_f	785.345
G6PDH2r_2_b	338.565
G6PDH2r_3_f	59849
G6PDH2r_3_b	29362
G6PDH2r_4_f	629.471
G6PDH2r_4_b	492.374
G6PDH2r_5_f	2317.45
G6PDH2r_5_b	1303.2
G6PDH2r_6_f	502.699
G6PDH2r_6_b	95.3566
GAPD_1_f	36172.1
GAPD_1_b	710.607
GAPD_2_f	153608
GAPD_2_b	642925
GAPD_3_f	27647.8
GAPD_3_b	10620
GAPD_4_f	10207.4
GAPD_4_b	74385
GAPD_5_f	24039
GAPD_5_b	4522.94
GAPD_6_f	1063.19
GAPD_6_b	83.0469
GAPD_7_f	1753.75
GAPD_7_b	212.322
GLNS_1_f	3799.86
GLNS_1_b	23826.1
GLNS_2_f	147.673
GLNS_2_b	26.6646
GLNS_3_f	1656.25
GLNS_3_b	4878.98
GLNS_4_f	9937.39
GLNS_4_b	373.385
GLNS_5_f	1229.01
GLNS_5_b	319.733
GLNS_6_f	5861
GLNS_6_b	1067.68
GLNS_7_f	163116
GLNS_7_b	8507.04
GLNS_8_f	581.489
GLNS_8_b	2514.64
GLUDy_1_f	126.201
GLUDy_1_b	31.2826
GLUDy_2_f	1582.73
GLUDy_2_b	2297.38
GLUDy_3_f	21370.1
GLUDy_3_b	1304.78
GLUDy_4_f	2690.45
GLUDy_4_b	6253.5
GLUDy_5_f	7586.38
GLUDy_5_b	3340.96
GLUDy_6_f	3233.97
GLUDy_6_b	1642.48
GLUDy_7_f	1976.09
GLUDy_7_b	1.92811
GLUDy_8_f	77.762
GLUDy_8_b	775.804
GLUN_1_f	902.189
GLUN_1_b	911.288
GLUN_2_f	1644.46
GLUN_2_b	311.752
GLUN_3_f	11098.6
GLUN_3_b	20410.1
GLUN_4_f	6273.84
GLUN_4_b	1.11862
GLUN_5_f	12066.7
GLUN_5_b	4819.96
GLUSy_1_f	1173.73
GLUSy_1_b	1070.5
GLUSy_2_f	469.912
GLUSy_2_b	114.331
GLUSy_3_f	1594.82
GLUSy_3_b	678.318
GLUSy_4_f	155.303
GLUSy_4_b	251.324
GLUSy_5_f	3863.39
GLUSy_5_b	2014.89
GLUSy_6_f	1205.38
GLUSy_6_b	232.962
GLUSy_7_f	6824.36
GLUSy_7_b	37.9793
GLUSy_8_f	3948.6
GLUSy_8_b	146.595
GND_1_f	16954.8
GND_1_b	3880.49
GND_2_f	3139.86
GND_2_b	246.048
GND_3_f	668.563
GND_3_b	551.023
GND_4_f	877.253
GND_4_b	375.96
GND_5_f	236.826
GND_5_b	5.28213
GND_6_f	592.948
GND_6_b	1677.09
ICDHyr_1_f	212560
ICDHyr_1_b	35.5549
ICDHyr_2_f	53013.8
ICDHyr_2_b	21540.8
ICDHyr_3_f	9758.96
ICDHyr_3_b	10255.2
ICDHyr_4_f	24692.2
ICDHyr_4_b	29590.9
ICDHyr_5_f	1185.82
ICDHyr_5_b	1278.44
ICDHyr_6_f	18828.5
ICDHyr_6_b	9156.9
ICL_1_f	1.63454e+06
ICL_1_b	267.768
ICL_2_f	236.873
ICL_2_b	71.7952
ICL_3_f	206.728
ICL_3_b	54.9847
ICL_4_f	527.191
ICL_4_b	5100.61
MALS_1_f	2352.14
MALS_1_b	78.4918
MALS_2_f	670.449
MALS_2_b	33.8959
MALS_3_f	630.783
MALS_3_b	331.514
MALS_4_f	603.476
MALS_4_b	19949.9
MALS_5_f	2363.26
MALS_5_b	253.192
MALS_6_f	906.607
MALS_6_b	297.498
MDH_1_f	11838.1
MDH_1_b	6347.87
MDH_2_f	349.877
MDH_2_b	476.934
MDH_3_f	2757.98
MDH_3_b	8206.95
MDH_4_f	6107.98
MDH_4_b	1170.45
MDH_5_f	6005.41
MDH_5_b	831.845
MDH_6_f	22293.1
MDH_6_b	11578.8
ME1_1_f	0.394604
ME1_1_b	0.0189077
ME1_2_f	0.115622
ME1_2_b	0.0901006
ME1_3_f	2.50095
ME1_3_b	411.321
ME1_4_f	48.8389
ME1_4_b	26.4551
ME1_5_f	88.2707
ME1_5_b	1.45737
ME1_6_f	3.83323
ME1_6_b	0.124731
PDH_1_f	485.133
PDH_1_b	615.677
PDH_2_f	1379.26
PDH_2_b	15755.6
PDH_3_f	265664
PDH_3_b	9310.03
PDH_4_f	52414
PDH_4_b	1.11442e+06
PDH_5_f	7587.73
PDH_5_b	541.012
PDH_6_f	52821.3
PDH_6_b	730.627
PFKA_1_f	286.275
PFKA_1_b	2016.17
PFKA_2_f	1987.29
PFKA_2_b	83547
PFKA_3_f	281419
PFKA_3_b	16759.5
PFKA_4_f	8694.42
PFKA_4_b	29435.1
PFKA_5_f	31443.6
PFKA_5_b	857.991
PFKA_6_f	10238
PFKA_6_b	67.9663
PGI_1_f	3212.81
PGI_1_b	2785.04
PGI_2_f	943.207
PGI_2_b	3860.18
PGI_3_f	2760.04
PGI_3_b	1090.06
PGK_1_f	463.693
PGK_1_b	2864.28
PGK_2_f	2963.42
PGK_2_b	314698
PGK_3_f	46794.2
PGK_3_b	467108
PGK_4_f	631072
PGK_4_b	1.41912e+06
PGK_5_f	10625.4
PGK_5_b	549.797
PGL_1_f	847.256
PGL_1_b	806.543
PGL_2_f	581.946
PGL_2_b	272.45
PGL_3_f	109.102
PGL_3_b	1.59659
PGL_4_f	144.851
PGL_4_b	411.415
PGL_5_f	67.5916
PGL_5_b	39.0682
PGM_1_f	355774
PGM_1_b	6131.68
PGM_2_f	122.664
PGM_2_b	306.046
PGM_3_f	577.168
PGM_3_b	13110.7
PPC_1_f	191500
PPC_1_b	237896
PPC_2_f	16932.2
PPC_2_b	2158.88
PPC_3_f	44302.1
PPC_3_b	11599.8
PPC_4_f	12824.1
PPC_4_b	58469.7
PPC_5_f	385963
PPC_5_b	4543.57
PPC_6_f	59590.9
PPC_6_b	2.74224e+07
PPC_7_f	2.68638e+06
PPC_7_b	747.935
PPCK_1_f	1199.98
PPCK_1_b	8405.34
PPCK_2_f	25581.7
PPCK_2_b	181.353
PPCK_3_f	1376.04
PPCK_3_b	3680.76
PPCK_4_f	7739.68
PPCK_4_b	1192.59
PPCK_5_f	5904.45
PPCK_5_b	31380.5
PPCK_6_f	14338.1
PPCK_6_b	43.7401
PPS_1_f	142557
PPS_1_b	384433
PPS_2_f	80647.8
PPS_2_b	64032.6
PPS_3_f	39977.2
PPS_3_b	28744.8
PPS_4_f	166606
PPS_4_b	61680.4
PPS_5_f	61045.8
PPS_5_b	10483.8
PPS_6_f	61939.3
PPS_6_b	69295.8
PPS_7_f	95500.9
PPS_7_b	43294.5
PPS_8_f	51431.2
PPS_8_b	152768
PPS_9_f	335028
PPS_9_b	58596.7
PYKF_1_f	15372.7
PYKF_1_b	1549.75
PYKF_2_f	11336.3
PYKF_2_b	9303.8
PYKF_3_f	3201.53
PYKF_3_b	99.8595
PYKF_4_f	642.186
PYKF_4_b	708.706
PYKF_5_f	3335.86
PYKF_5_b	174.333
PYKF_6_f	937.919
PYKF_6_b	1809.88
RPE_1_f	18.5692
RPE_1_b	958.969
RPE_2_f	1475.96
RPE_2_b	216.212
RPE_3_f	660.151
RPE_3_b	34.6318
RPI_1_f	107.281
RPI_1_b	43.5579
RPI_2_f	7.0585
RPI_2_b	166.78
RPI_3_f	1192.11
RPI_3_b	1126.71
SUCDi_1_f	897.904
SUCDi_1_b	2725.89
SUCDi_2_f	350.25
SUCDi_2_b	3361.11
SUCDi_3_f	60631.6
SUCDi_3_b	262365
SUCDi_4_f	55734
SUCDi_4_b	319.478
SUCDi_5_f	14491.5
SUCDi_5_b	105.8
SUCOAS_1_f	4.9044
SUCOAS_1_b	1028.46
SUCOAS_2_f	46152.1
SUCOAS_2_b	1.3529e+07
SUCOAS_3_f	6.15419e+06
SUCOAS_3_b	4.25566e+06
SUCOAS_4_f	4604.95
SUCOAS_4_b	139467
SUCOAS_5_f	1.81534e+06
SUCOAS_5_b	125605
SUCOAS_6_f	27981.7
SUCOAS_6_b	1988.68
TALA_1_f	3338.68
TALA_1_b	69.5734
TALA_2_f	6.87389
TALA_2_b	31.1975
TALA_3_f	56.6643
TALA_3_b	270.518
TALA_4_f	153.644
TALA_4_b	1814.26
TALA_5_f	151.879
TALA_5_b	38.4611
TKT1_1_f	367.623
TKT1_1_b	21.6626
TKT1_2_f	12.9364
TKT1_2_b	3.29077
TKT1_3_f	22.851
TKT1_3_b	3.84759
TKT1_4_f	155.567
TKT1_4_b	17119
TKT1_5_f	2873.53
TKT1_5_b	41.6936
TKT2_1_f	99.947
TKT2_1_b	8.30579
TKT2_2_f	11.6533
TKT2_2_b	2271.74
TKT2_3_f	1704.2
TKT2_3_b	87.0484
TKT2_4_f	95.9552
TKT2_4_b	23.4811
TKT2_5_f	32.4965
TKT2_5_b	17.7979
TPI_1_f	152.782
TPI_1_b	4846.74
TPI_2_f	69664.8
TPI_2_b	1024.96
TPI_3_f	271.549
TPI_3_b	1014.73
