# Supplementary material for: Emergence of growth and dormancy from a kinetic model of the Escherichia coli central carbon metabolism
Source: Research Square preprint supplement (doi:10.21203/rs.3.rs-1193900/v1), 2022-01-07
Supplement: Supplementary file 3 [file SI_Data3.xls]

## Sheet: reactions
reaction name	substrates	products	reversibility parameter
ACONTa	cit	acon	1
ACONTb	acon	icit	1
ADK1	amp,atp	adp,adp	1
AKGDH	akg,nad	nadh,succoa	1e-06
CS	accoa,oaa	cit	1e-06
ENO	2pg	pep	1
FBA	fdp	dhap,g3p	1
FBP	fdp	f6p	1e-06
FRD7	fum	succ	1e-06
FUM	fum	mal	1
G6PDH2r	glc,nadp	6pgl,nadph	1
GAPD	g3p,nad	13dpg,nadh	1
GND	6pgc,nadp	nadph,ru5p	1e-06
ICDHyr	icit,nadp	akg,nadph	1
ICL	icit	glx,succ	1e-06
MALS	accoa,glx	mal	1e-06
MDH	mal,nad	nadh,oaa	1
ME1	mal,nad	nadh,pyr	1
PDH	nad,pyr	accoa,nadh	1e-06
PFK	atp,f6p	adp,fdp	1e-06
PGI	glc	f6p	1
PGK	3pg,atp	13dpg,adp	1
PGL	6pgl	6pgc	1e-06
PGM	2pg	3pg	1
PPC	pep	oaa	1e-06
PPCK	atp,oaa	adp,pep	1e-06
PPS	atp,pyr	amp,pep	1e-06
PYK	adp,pep	atp,pyr	1e-06
RPE	ru5p	xu5p	1
RPI	r5p	ru5p	1
SUCOAS	atp,succ	adp,succoa	1
TALA	g3p,s7p	e4p,f6p	1
TKT1	r5p,xu5p	g3p,s7p	1
TKT2	e4p,xu5p	f6p,g3p	1
TPI	dhap	g3p	1
GLUDy	glu,nadp	akg,nadph	1
GLUN	gln	glu	1e-06
GLUSy	akg,gln,nadph	glu,glu,nadp	1e-06
GLNS	atp,glu	adp,gln	1e-06
ATPPMF	adp,nadh	atp,nad	1e-06
NADTRHD	nad,nadph	nadh,nadp	1e-06
growth	e4p,gln,atp	adp	0

## Sheet: chemicals
chemical name	comment
13dpg
2pg
3pg
6pgc
6pgl
accoa
acon
adp
akg
amp
atp
cit
dhap
e4p
f6p
fdp
fum
g3p
glc	here we dealt g6p as glc (nutrient having a constant concentration)
gln
glu
glx
icit
mal
nad
nadh
nadp
nadph
oaa
pep
pyr
r5p
ru5p
s7p
succ
succoa
xu5p
