# Supplementary material for: Emergence of growth and dormancy from a kinetic model of the Escherichia coli central carbon metabolism
Source: Research Square preprint supplement (doi:10.21203/rs.3.rs-1193900/v1), 2022-01-07
Supplement: Supplementary file 4 [file SI_Data4.xls]

## Sheet: README
Here we present the minimal models obtained from the random reduction.
Please note that the name of reactions and chemicals have no meaning because they are contracted and renamed during the model reduction.
However, the reaction named 'growth' has a specific role. It is used to determine the dilution rate.

## Sheet: minimal_model#0
Reaction	Substrates	Products	reversibility constant
ADK1	amp,atp	adp,adp	1.0
FBA	glc	dhap,dhap	1.0
FRD7	fum	succ	1e-06
ICDHyr	icit,adp	gln,atp	1.0
ICL	icit	glx,succ	1e-06
MALS	pyr,glx	fum	1e-06
ME1	fum,adp	atp,pyr	1.0
PPS	atp,pyr	amp,dhap	1e-06
SUCOAS	atp,succ	adp,gln	1.0
growth	gln,atp,dhap	adp	0

## Sheet: minimal_model#1
Reaction	Substrates	Products	reversibility constant
ADK1	amp,atp	adp,adp	1.0
GAPD	g3p,adp	2pg,atp	1.0
PFK	atp,fdp	adp,fdp	1e-06
PGI	glc	fdp	1.0
PGL	glc	r5p	1e-06
PPS	atp,gln	amp,2pg	1e-06
RPE	r5p	xu5p	1.0
TALA	g3p,s7p	e4p,fdp	1.0
TKT1	r5p,xu5p	g3p,s7p	1.0
TKT2	e4p,xu5p	fdp,g3p	1.0
growth	e4p,gln,atp	adp	0

## Sheet: minimal_model#2
Reaction	Substrates	Products	reversibility constant
ADK1	amp,atp	adp,adp	1.0
FUM	glu	mal	1.0
G6PDH2r	glc,adp	r5p,atp	1.0
GAPD	g3p,adp	oaa,atp	1.0
PGI	glc	f6p	1.0
PPS	atp,mal	amp,oaa	1e-06
PYK	adp,oaa	atp,mal	1e-06
RPE	r5p	xu5p	1.0
TALA	g3p,s7p	e4p,f6p	1.0
TKT1	r5p,xu5p	g3p,s7p	1.0
TKT2	e4p,xu5p	f6p,g3p	1.0
growth	e4p,glu,atp	adp	0

## Sheet: minimal_model#3
Reaction	Substrates	Products	reversibility constant
ADK1	amp,atp	adp,adp	1.0
CS	accoa,oaa	cit	1e-06
FBA	fdp	dhap,dhap	1.0
FRD7	fum	succ	1e-06
GAPD	dhap,adp	2pg,atp	1.0
ICL	cit	glx,succ	1e-06
MALS	accoa,glx	fum	1e-06
ME1	fum,adp	atp,pyr	1.0
PFK	atp,glc	adp,fdp	1e-06
PPC	2pg	oaa	1e-06
PPCK	atp,oaa	adp,2pg	1e-06
PPS	atp,pyr	amp,2pg	1e-06
growth	cit,atp,dhap	adp	0

## Sheet: minimal_model#4
Reaction	Substrates	Products	reversibility constant
ADK1	amp,atp	adp,adp	1.0
CS	accoa,mal	cit	1e-06
ENO	glc	pep	1.0
ICL	cit	glx,gln	1e-06
MALS	accoa,glx	mal	1e-06
PDH	adp,pyr	accoa,atp	1e-06
PPC	pep	mal	1e-06
PPCK	atp,mal	adp,pep	1e-06
PPS	atp,pyr	amp,pep	1e-06
growth	gln,atp,glc	adp	0

## Sheet: minimal_model#5
Reaction	Substrates	Products	reversibility constant
CS	accoa,oaa	cit	1e-06
FBP	fdp	glc	1e-06
GAPD	fdp,adp	pyr,atp	1.0
ICL	cit	glx,fum	1e-06
MALS	accoa,glx	fum	1e-06
PDH	adp,pyr	accoa,atp	1e-06
PPC	pyr	oaa	1e-06
PPCK	atp,oaa	adp,pyr	1e-06
growth	fum,atp,fdp	adp	0

## Sheet: minimal_model#6
Reaction	Substrates	Products	reversibility constant
ADK1	amp,atp	adp,adp	1.0
CS	accoa,2pg	cit	1e-06
ICL	cit	glx,gln	1e-06
MALS	accoa,glx	gln	1e-06
PDH	adp,pyr	accoa,atp	1e-06
PFK	atp,f6p	adp,fdp	1e-06
PGI	glc	f6p	1.0
PGM	2pg	fdp	1.0
PPS	atp,pyr	amp,2pg	1e-06
PYK	adp,2pg	atp,pyr	1e-06
TKT2	e4p,glc	f6p,fdp	1.0
growth	e4p,gln,atp	adp	0

## Sheet: minimal_model#7
Reaction	Substrates	Products	reversibility constant
ADK1	amp,atp	adp,adp	1.0
GAPD	g3p,adp	2pg,atp	1.0
PFK	atp,fdp	adp,fdp	1e-06
PGI	glc	fdp	1.0
PGL	glc	r5p	1e-06
PPS	atp,gln	amp,2pg	1e-06
RPE	r5p	xu5p	1.0
TALA	g3p,s7p	e4p,fdp	1.0
TKT1	r5p,xu5p	g3p,s7p	1.0
TKT2	e4p,xu5p	fdp,g3p	1.0
growth	e4p,gln,atp	adp	0

## Sheet: minimal_model#8
Reaction	Substrates	Products	reversibility constant
ADK1	amp,atp	adp,adp	1.0
CS	accoa,oaa	cit	1e-06
FRD7	fum	glu	1e-06
ICL	cit	glx,glu	1e-06
MALS	accoa,glx	fum	1e-06
MDH	fum,adp	atp,oaa	1.0
PDH	adp,pyr	accoa,atp	1e-06
PGK	3pg,atp	g3p,adp	1.0
PGM	2pg	3pg	1.0
PPC	2pg	oaa	1e-06
PPS	atp,pyr	amp,2pg	1e-06
PYK	adp,2pg	atp,pyr	1e-06
RPE	glc	xu5p	1.0
TALA	g3p,s7p	e4p,f6p	1.0
TKT1	glc,xu5p	g3p,s7p	1.0
TKT2	e4p,xu5p	f6p,g3p	1.0
growth	e4p,glu,atp	adp	0

[truncated: 5 more sheets: minimal_model#9, minimal_model#10, minimal_model#11, minimal_model#12, minimal_model#13]
